# Supplementary material for: A multi-model analysis of teleconnected crop yield variability in a range of cropping systems
Source: Copernicus journal article supplement (doi:10.5194/esd-2019-8), 2019-03-06
Supplement: Supplementary file 1 [file esd-2019-8-supplement.zip]

Table supporting Section 3.1: Global extent of climate oscillation impacts

Table S1. Extent of significant anomalies. Crop-specific harvested area (10<sup>6</sup> ha) extent (and percent of total crop-specific harvested area), where actual crop yield shows statistically significant anomalies during the strong phases of ENSO, IOD and NAO.

|          | Positive<br>ENSO<br>(El Niño) | Negative<br>ENSO<br>(La Niña) | Positive IOD | Negative<br>IOD | Positive<br>NAO | Negative<br>NAO |
|----------|-------------------------------|-------------------------------|--------------|-----------------|-----------------|-----------------|
| Maize    | 74 (49%)                      | 70 (46%)                      | 62 (41%)     | 56 (37%)        | 29 (19%)        | 54 (36%)        |
| Rice     | 62 (37%)                      | 67 (41%)                      | 69 (42%)     | 33 (20%)        | 47 (29%)        | 33 (20%)        |
| Soybeans | 26 (35%)                      | 30 (41%)                      | 21 (28%)     | 35 (47%)        | 11 (14%)        | 21 (28%)        |
| Wheat    | 66 (31%)                      | 86 (40%)                      | 87 (41%)     | 86 (40%)        | 49 (23%)        | 47 (22%)        |

Figures supporting Section 3.2: Impacts in different areas

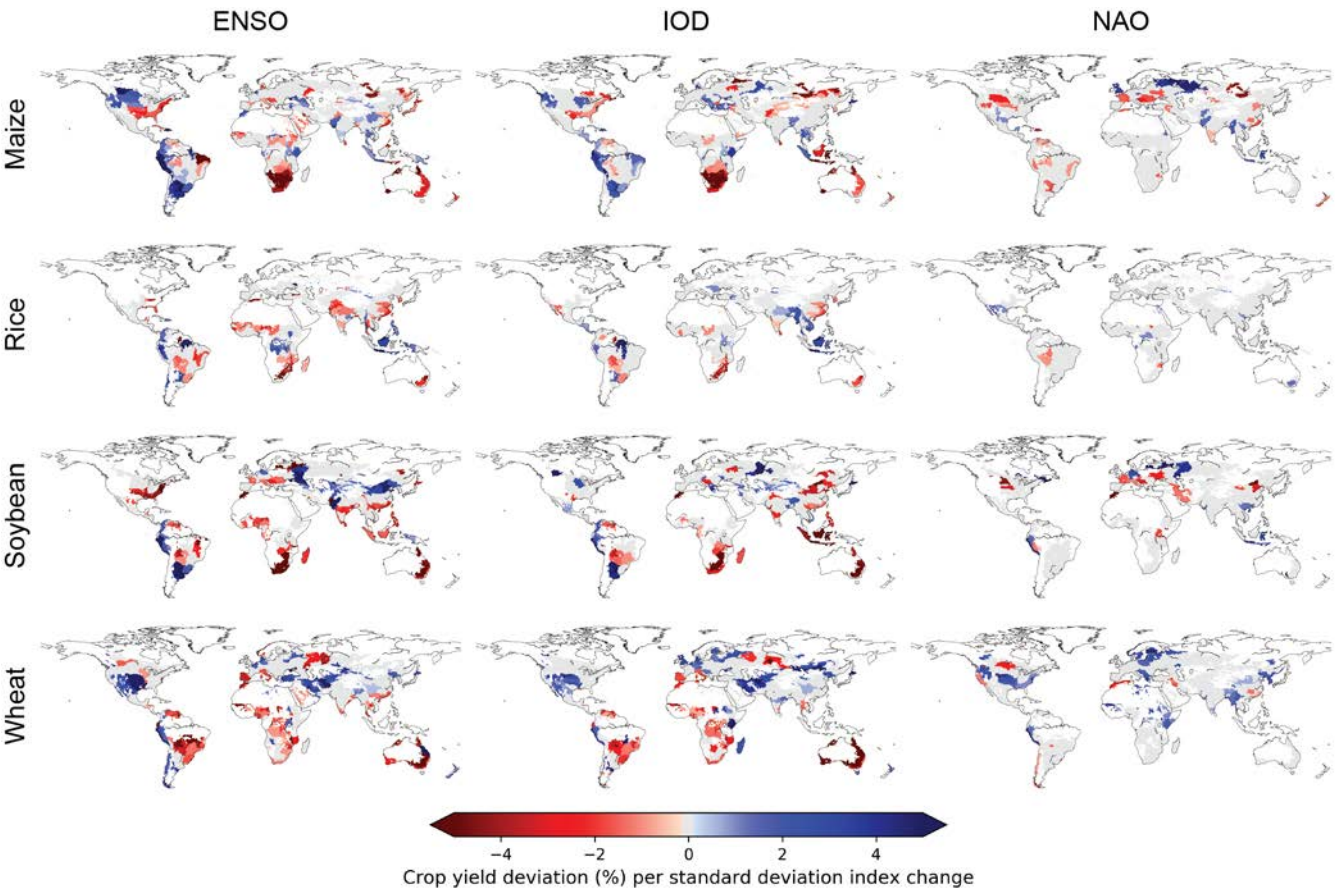

Figure S1. Actual crop yield sensitivity to ENSO, IOD and NAO at FPU scale using the Princeton dataset. The sensitivity values are derived from all GGCMS that simulate the crop in question with the Princeton Global Forcing data set (Princeton) climate input using the fullharm (harm-suffN for LPJmL and LPJ-GUESS) model setup. Statistically insignificant ( $p > 0.1$ ) sensitivity values are marked as zero. White color denotes that the crop in question is not produced in that area. Results with AgMERRA climate input are shown in Figure 1 in the main text.

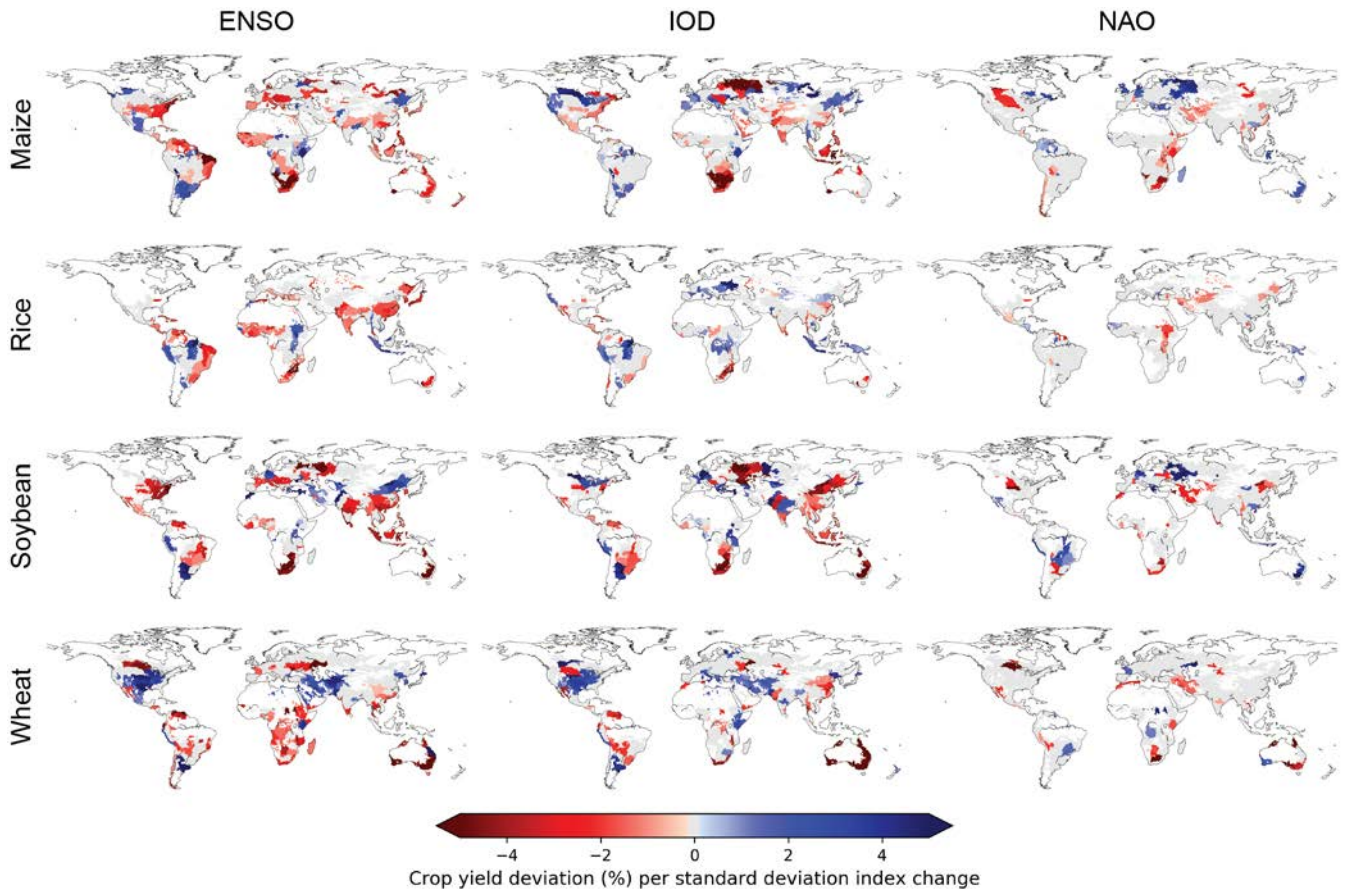

Figure S2. Actual crop yield sensitivity to ENSO, IOD and NAO at FPU scale using the default setup. The sensitivity values are derived from all GGCMS that simulate the crop in question with the AgMERRA climate input. Statistically insignificant ( $p > 0.1$ ) sensitivity values are marked as zero. White color denotes that the crop in question is not produced in that area. Results with fullharm (harm-suffN for LPJmL and LPJ-GUESS) model setup are shown in Figure 1 in the main text.

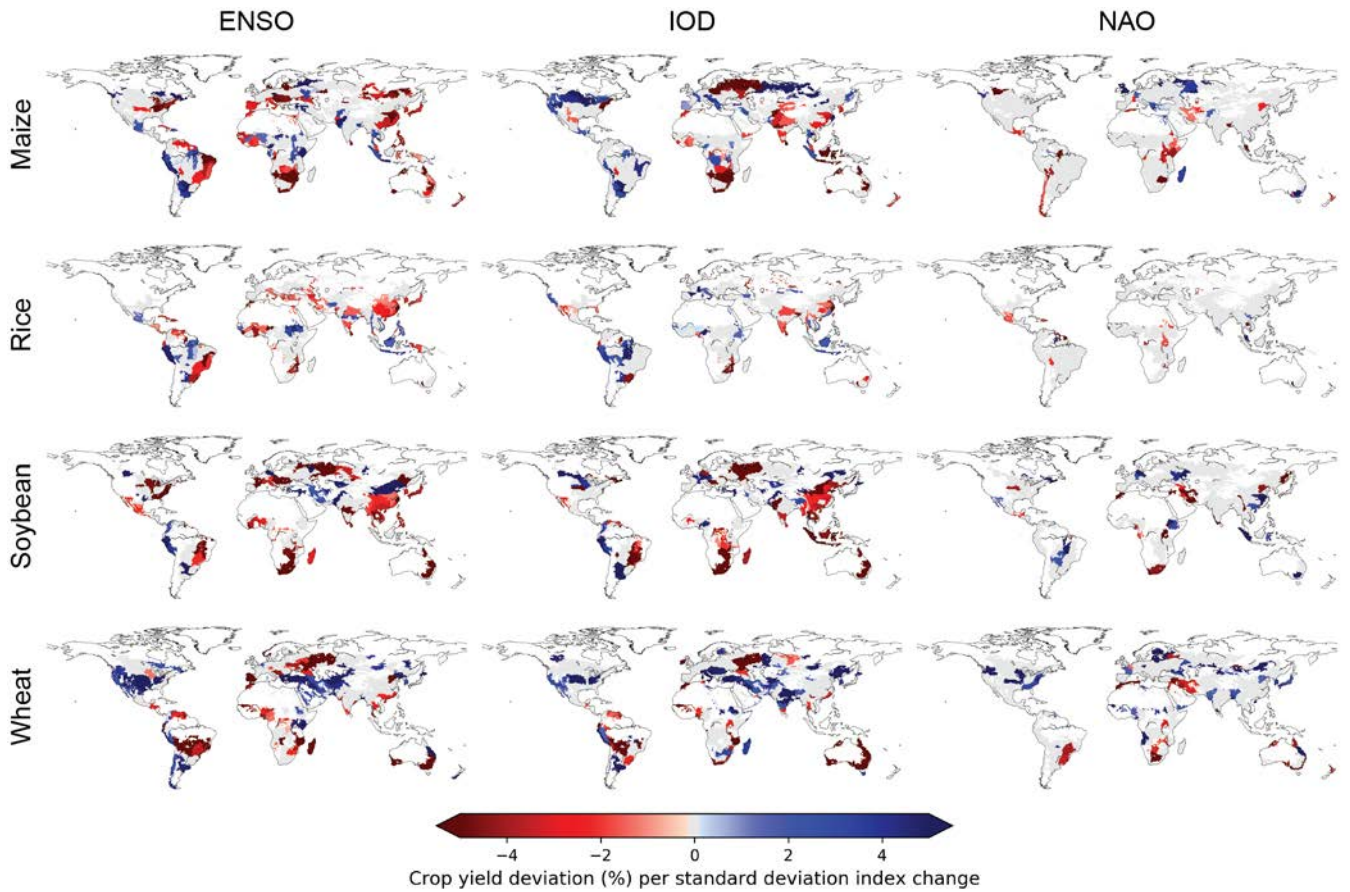

Figure S3. Median actual crop yield sensitivity to ENSO, IOD and NAO of the individual model results. The sensitivity values are derived from the models that simulate the crop in question with the AgMERRA climate input. Statistically insignificant ( $p > 0.1$ ) sensitivity values (in the ensemble or individual model results) are marked as zero. White color denotes that the crop in question is not produced in that area. Results across the full ensemble are shown in Figure 1 in the main text.

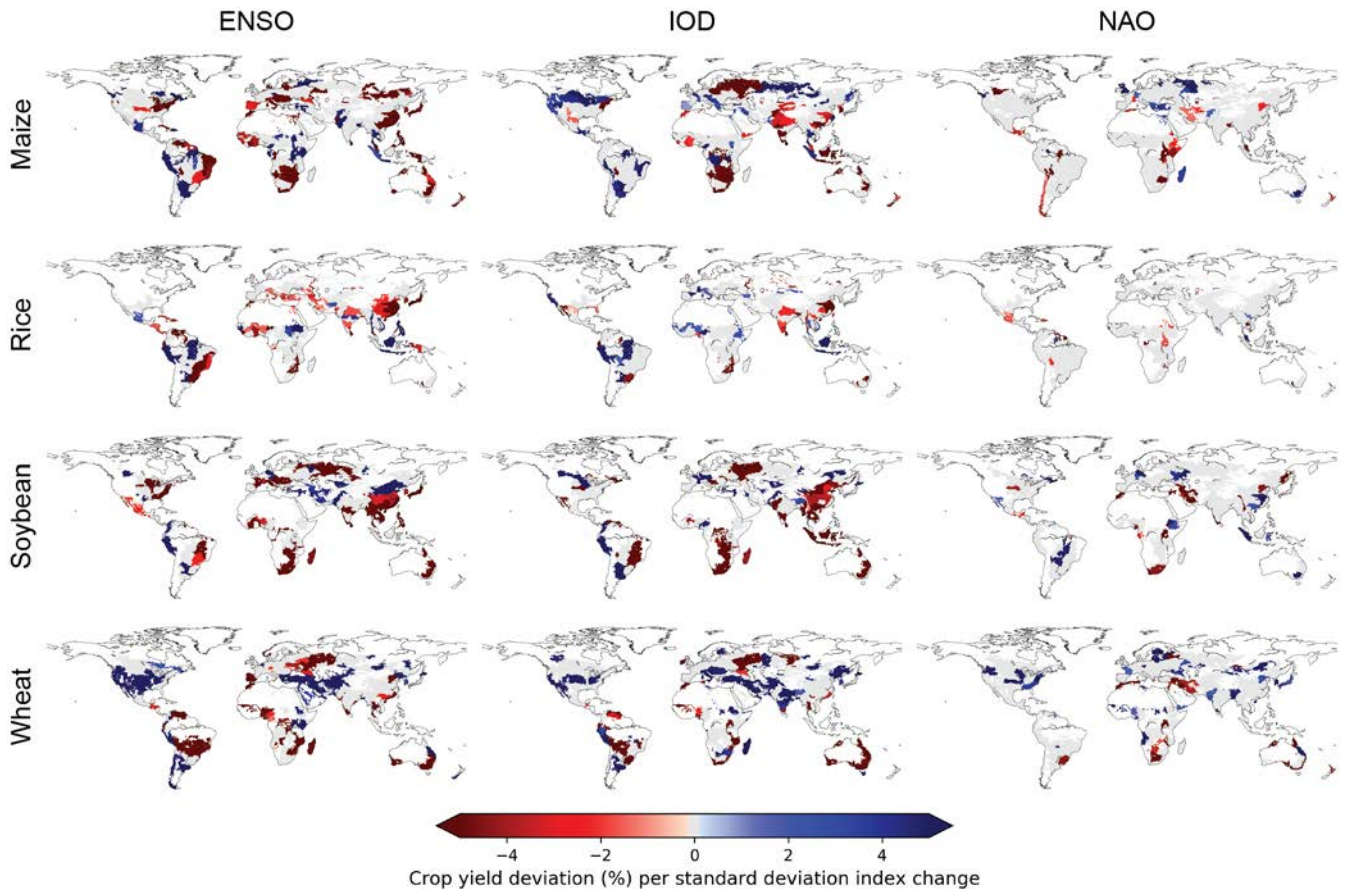

Figure S4. Maximum (in terms of magnitude) actual crop yield sensitivity to ENSO, IOD and NAO of the individual model results that show significant sensitivity of same sign compared to the ensemble results. The sensitivity values are derived from all the models that simulate the crop in question with the AgMERRA climate input. Statistically insignificant ( $p > 0.1$ ) sensitivity values are marked as zero. White color denotes that the crop in question is not produced in that area.



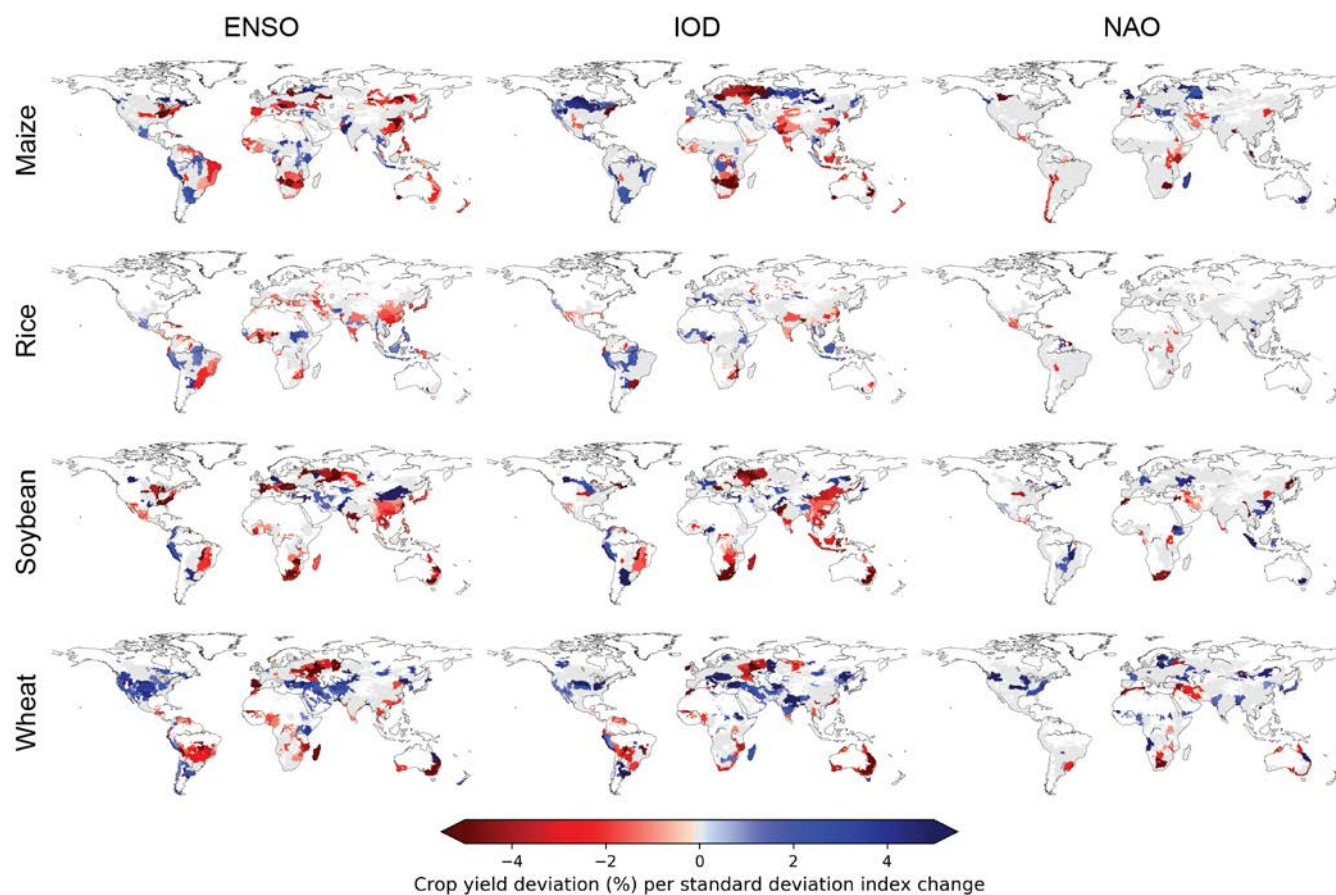

Figure S5. Minimum (in terms of magnitude) actual crop yield sensitivity to ENSO, IOD and NAO of the individual model results that show significant sensitivity of same sign compared to the ensemble results. The sensitivity values are derived from the models that simulate the crop in question with the AgMERRA climate input. Statistically insignificant ( $p > 0.1$ ) sensitivity values are marked as zero. White color denotes that the crop in question is not produced in that area.

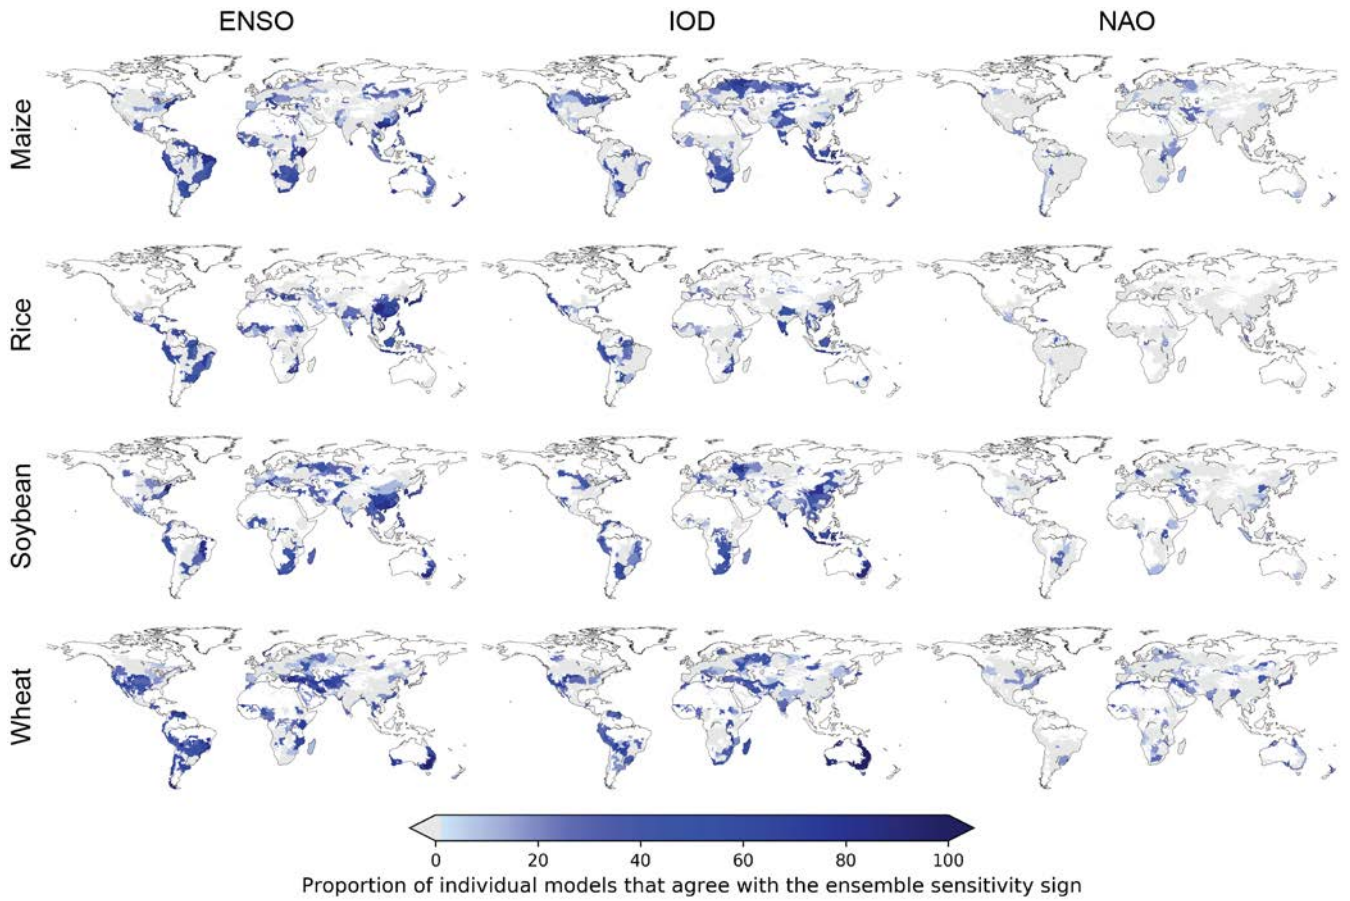

Figure S6. Consistency across models. Proportion of individual models that show significant sensitivity of same sign compared to the result from the ensemble sensitivity analysis (Figure 1). Areas where the ensemble results or individual model results do not show a statistically significant relationship are marked as zero. White color denotes that the crop in question is not grown in that area.

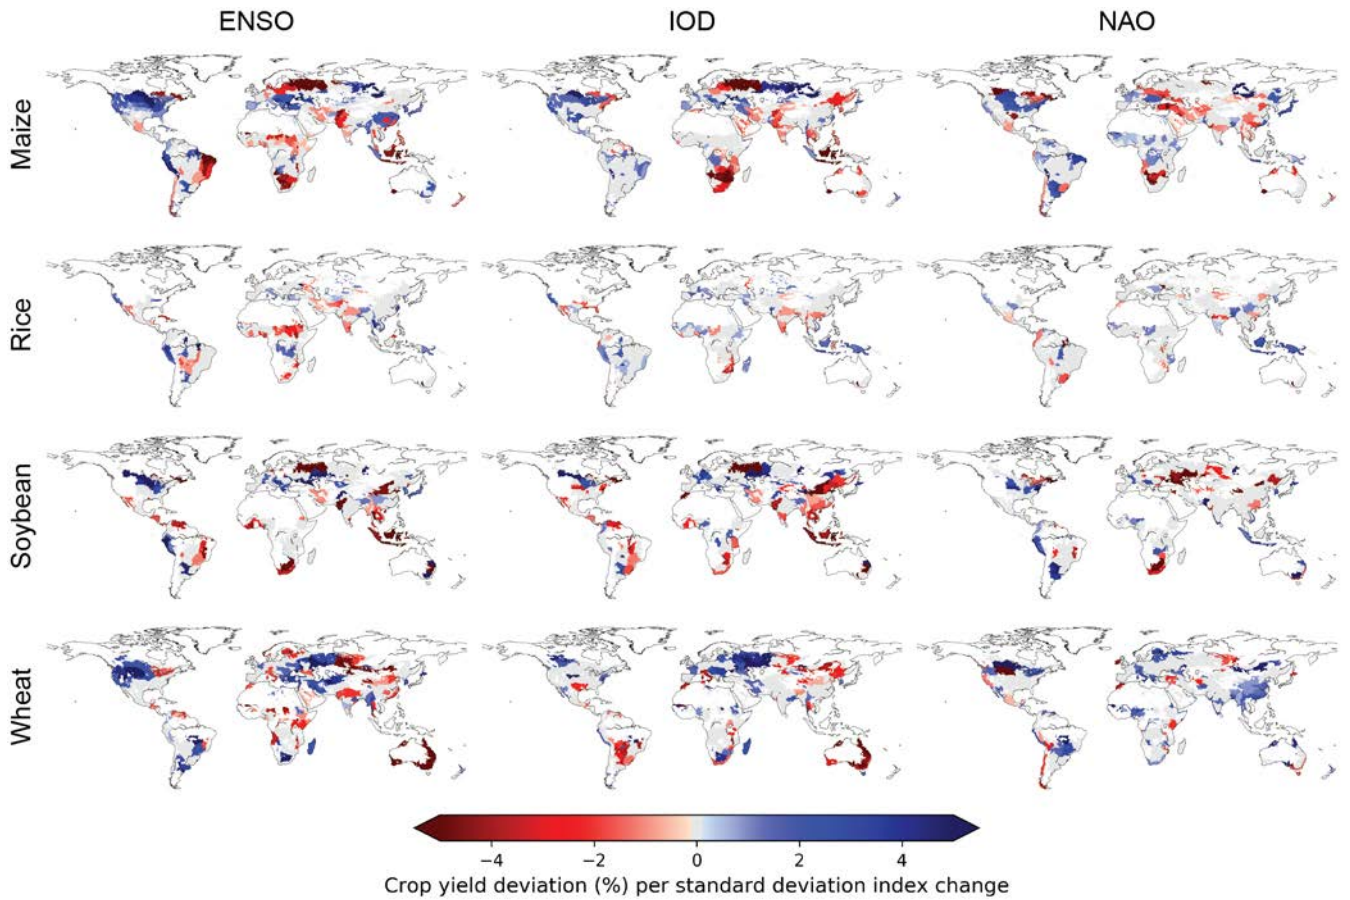

Figure S7. Actual crop yield sensitivity to harvest season ENSO, IOD and NAO at FPU scale. The sensitivity values are derived from a sample including crop yield data from all GCMs that simulate the crop in question with the AgMERRA climate input. Statistically insignificant ( $p > 0.1$ ) sensitivity values are marked as zero. White color denotes that the crop in question is not produced in that area. Sensitivity with oscillation indices calculated for the months when the oscillations tend to have the strongest signal is shown in Figure 1 in the main text.



Maize

Rice

Soybean

Wheat

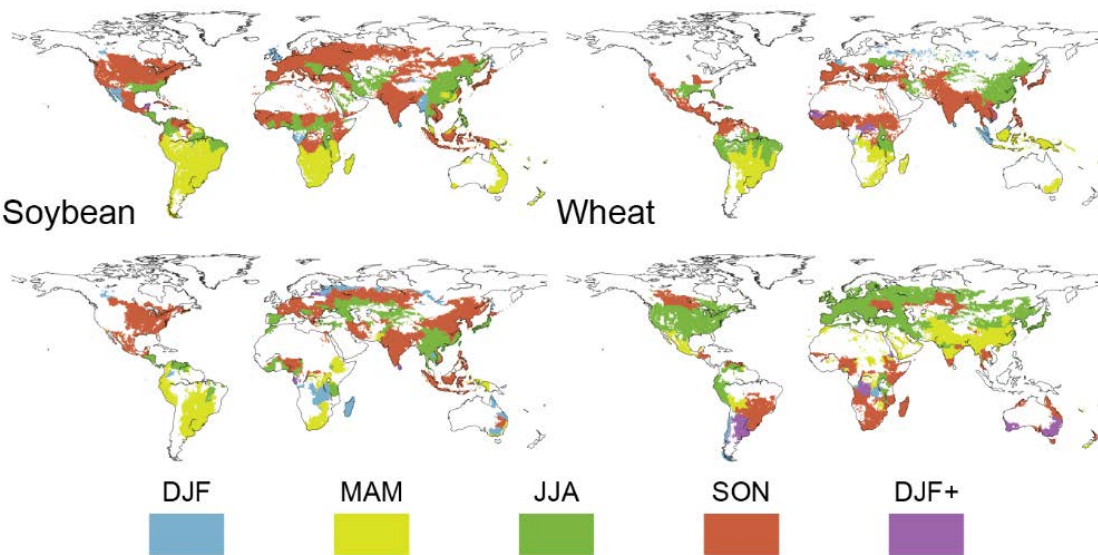

Figure S8. Seasons used for assessing the sensitivity of crop yield to the status of ENSO, IOD and NAO during harvesting season (Supplementary Figure 19). DJF (DJF+) denotes that the start-of-the-year (end-of-the-year) DJF average index was used. The DJF (DJF+) was used if crops were harvested between January 1<sup>st</sup> and February 28<sup>th</sup> (December 1<sup>st</sup> and December 31<sup>st</sup>). As multiple harvesting dates exist inside each FPU, the season with the largest harvested area was selected for each FPU. White color denotes that the crop in question is not produced in that area.

Figures supporting Section 3.3 Magnitude of impacts in different cropping systems

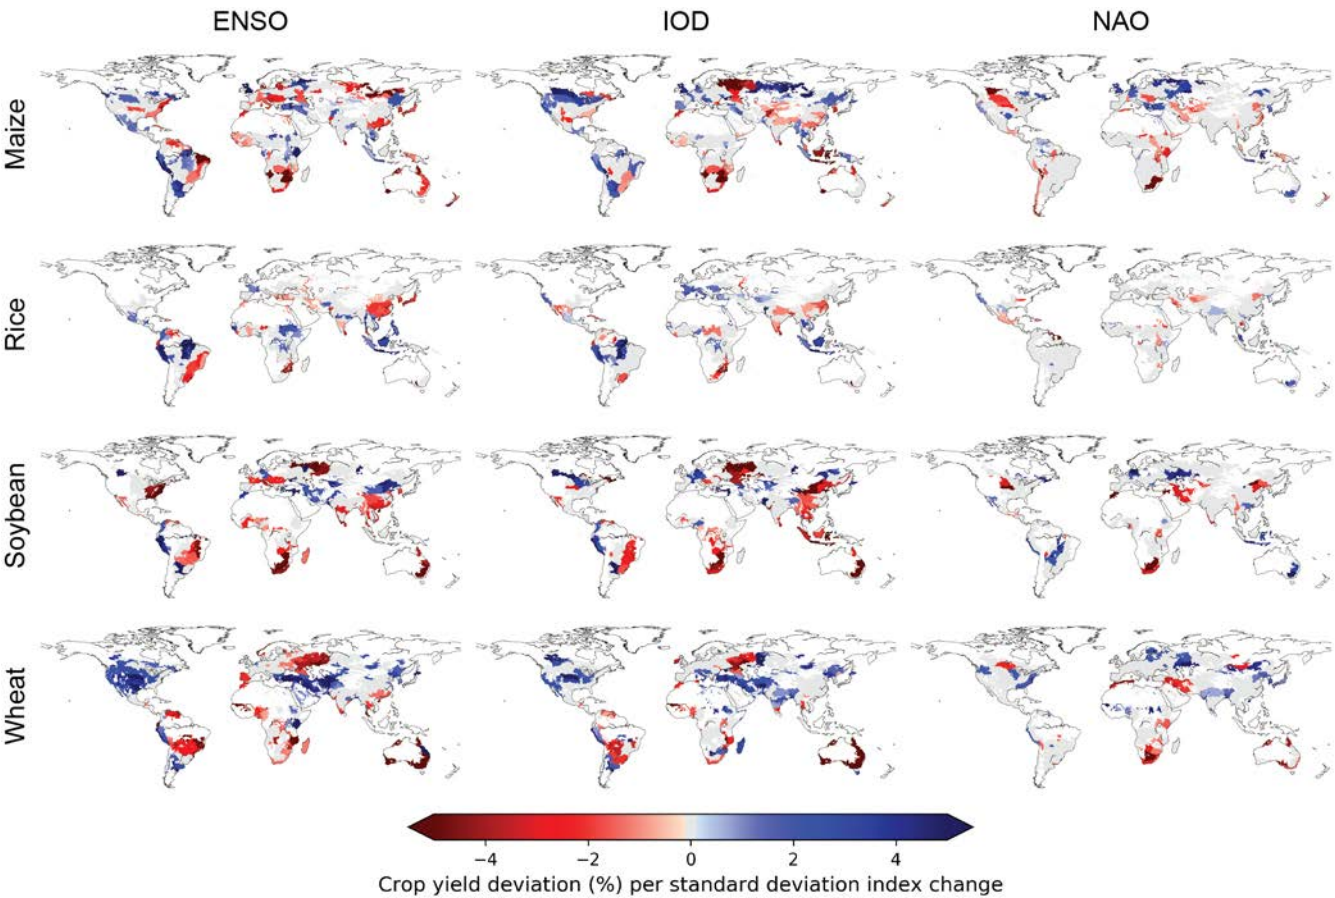

Figure S9. Actual crop yield sensitivity to ENSO, IOD and NAO at FPU scale. The sensitivity values are derived using crop yield data from all GGCMS that simulate the crop in question with the AgMERRA climate input, and have data for both ‘fullharm’ and ‘harm-suffN’ settings: pDSSAT, EPIC-Boku, EPIC-IIASA, GEPIC, pAPSIM, PEGASUS, EPIC-TAMU, ORCHIDEE-crop, PEPIC. Statistically insignificant ( $p > 0.1$ ) sensitivity values are marked as zero. White color denotes that the crop in question is not produced in that area. These results were used for comparison between cropping systems. Results for all models that simulate the crop in question are shown in Figure 1 in the main text.

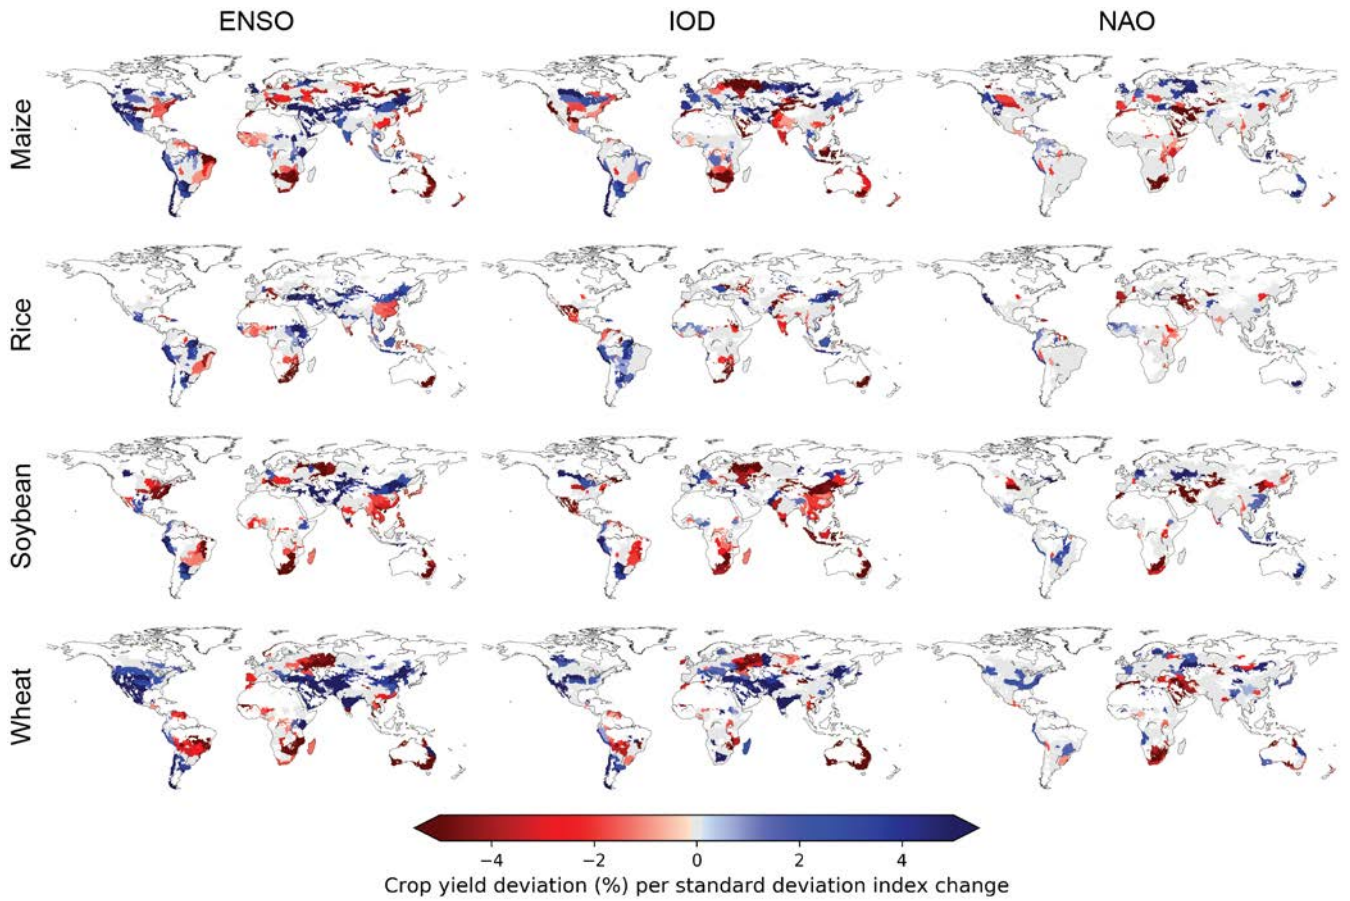

Figure S10. Rainfed crop yield sensitivity to ENSO, IOD and NAO at FPU scale. The sensitivity values are derived using crop yield data from all GCMs that simulate the crop in question with the AgMERRA climate input using the fullharm (harm-suffN for LPJmL and LPJ-GUESS) set-up. Statistically insignificant ( $p > 0.1$ ) sensitivity values are marked as zero. White color denotes that the crop in question is not produced in that area.

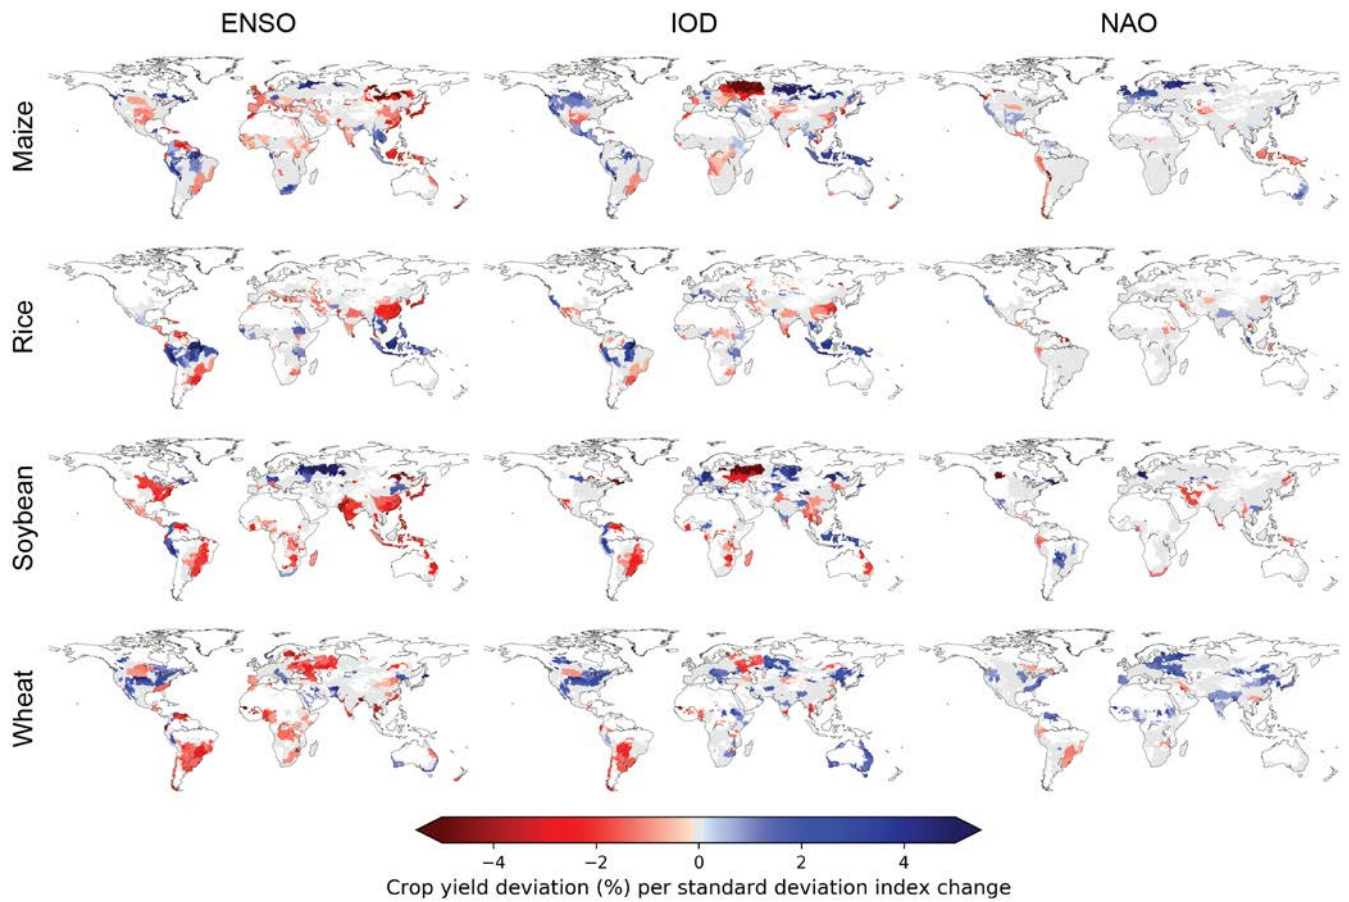

Figure S11. Fully irrigated crop yield sensitivity to ENSO, IOD and NAO at FPU scale. The sensitivity values are derived using crop yield data from all GGCMs that simulate the crop in question with the AgMERRA climate input using the fullharm (harm-suffN for LPJmL and LPJ-GUESS) set-up. Statistically insignificant ( $p > 0.1$ ) sensitivity values are marked as zero. White color denotes that the crop in question is not produced in that area.



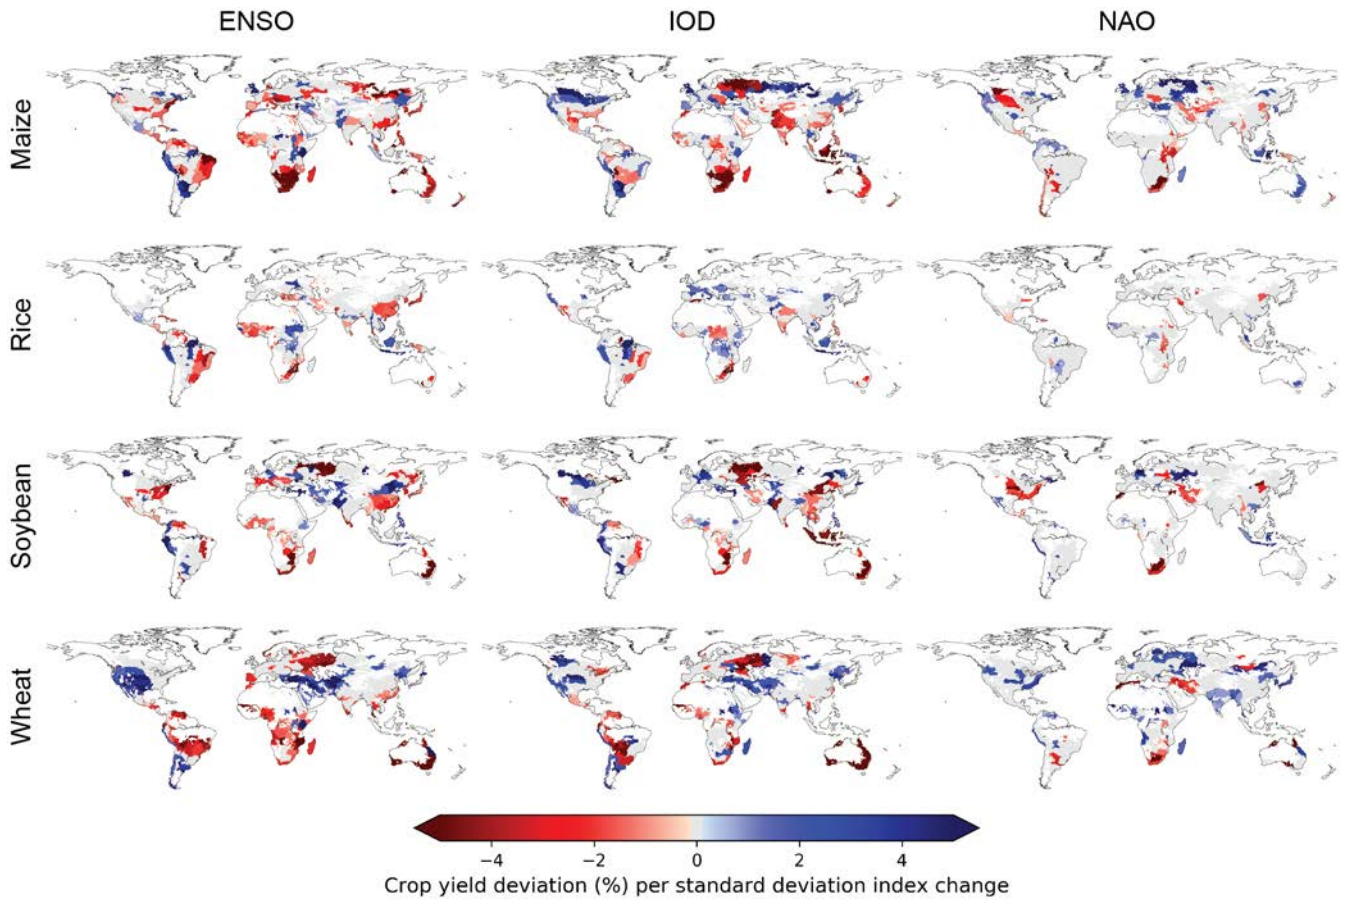

Figure S12. Fully fertilized crop yield sensitivity to ENSO, IOD and NAO at FPU scale. The sensitivity values are derived using crop yield data from all GGCMs that simulate the crop in question with the AgMERRA climate input, and have data for both ‘fullharm’ and ‘harm-suffN’ settings: pDSSAT, EPIC-Boku, EPIC-IIASA, GEPIC, pAPSIM, PEGASUS, EPIC-TAMU, ORCHIDEE-crop, PEPIC. Statistically insignificant ( $p > 0.1$ ) sensitivity values are marked as zero. White color denotes that the crop in question is not produced in that area.

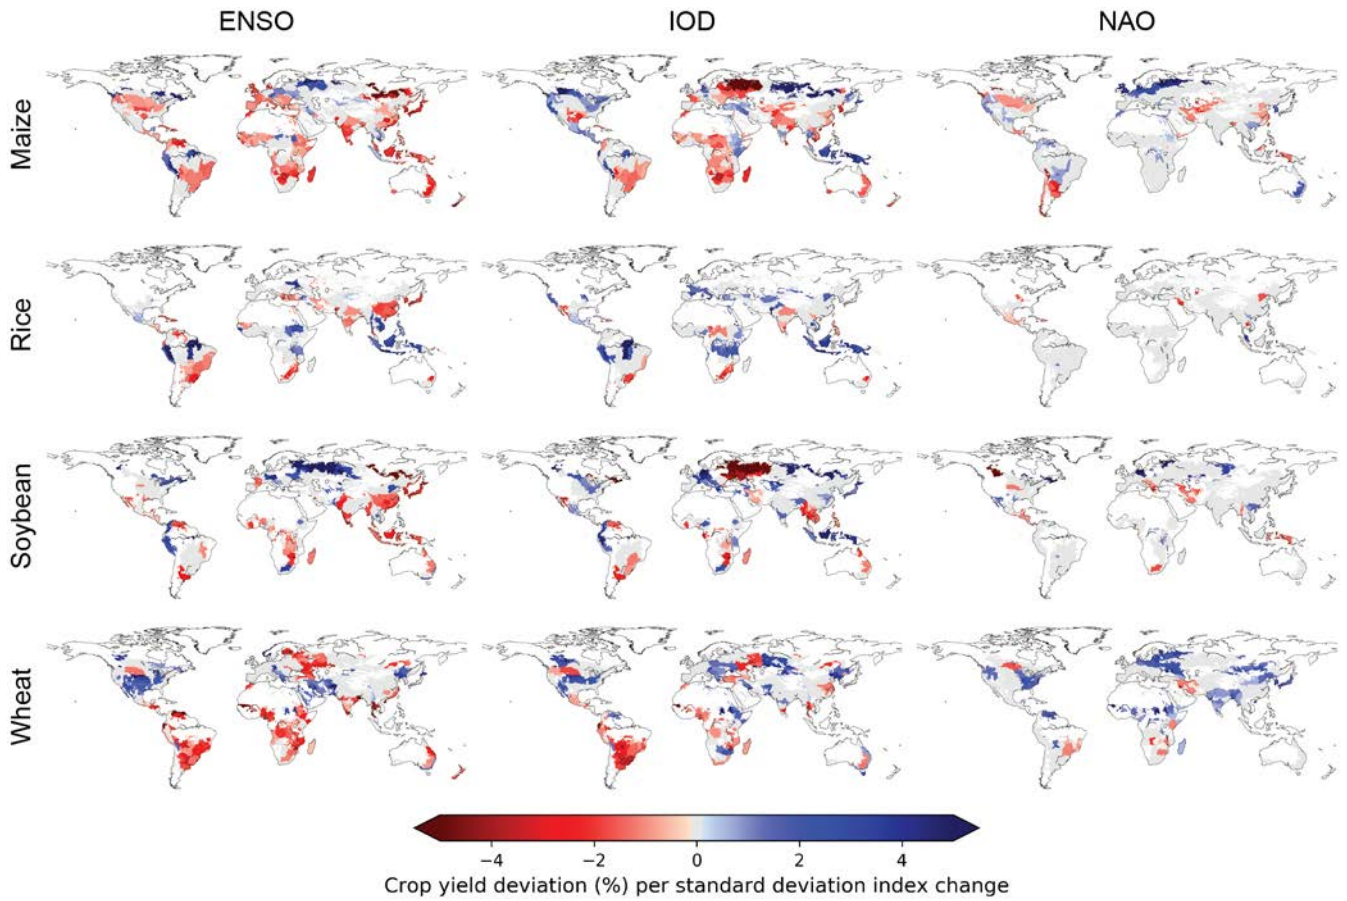

Figure S13. Fully fertilized and irrigated crop yield sensitivity to ENSO, IOD and NAO at FPU scale. The sensitivity values are derived using crop yield data from all GGCs that simulate the crop in question with the AgMERRA climate input, and have data for both 'fullharm' and 'harm-suffN' settings: pDSSAT, EPIC-Boku, EPIC-IIASA, GEPIC, pAPSIM, PEGASUS, EPIC-TAMU, ORCHIDEE-crop, PEPIC. Statistically insignificant ( $p > 0.1$ ) sensitivity values are marked as zero. White color denotes that the crop in question is not produced in that area.

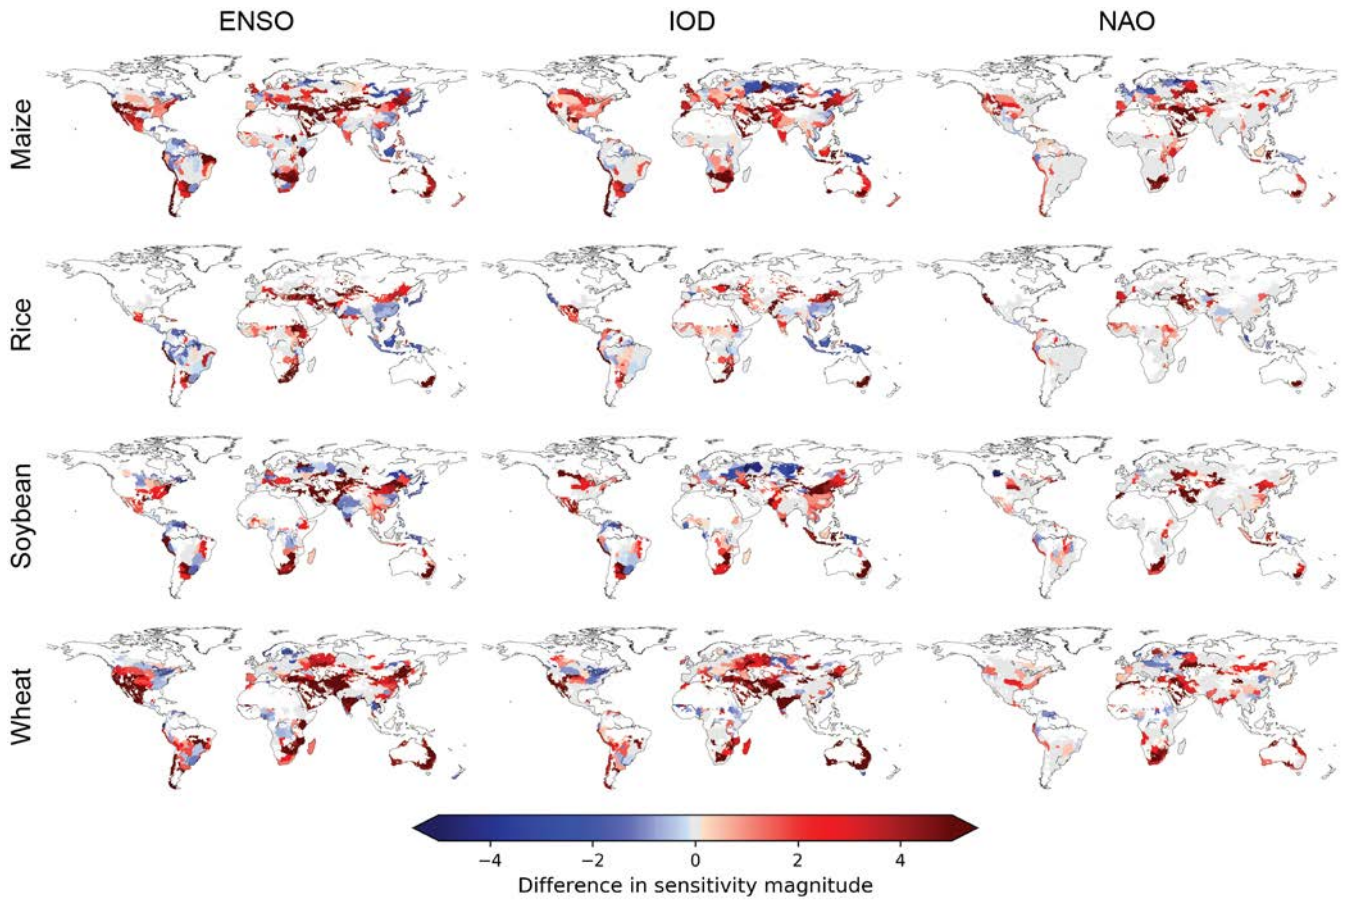

Figure S14. Fully irrigated vs rainfed sensitivity. Difference in magnitude of crop yield sensitivity to ENSO, IOD and NAO between fully irrigated and rainfed scenario at FPU scale. Results are shown only for those FPUs that show statistically significant ( $p > 0.1$ ) sensitivity in either scenario. If neither scenario shows significant sensitivity, difference marked as zero (gray color). The sensitivity values are derived from a sample including crop yield data from all GGCMs that simulate the crop in question with the AgMERRA climate input. White color denotes that the crop in question is not produced in that area.

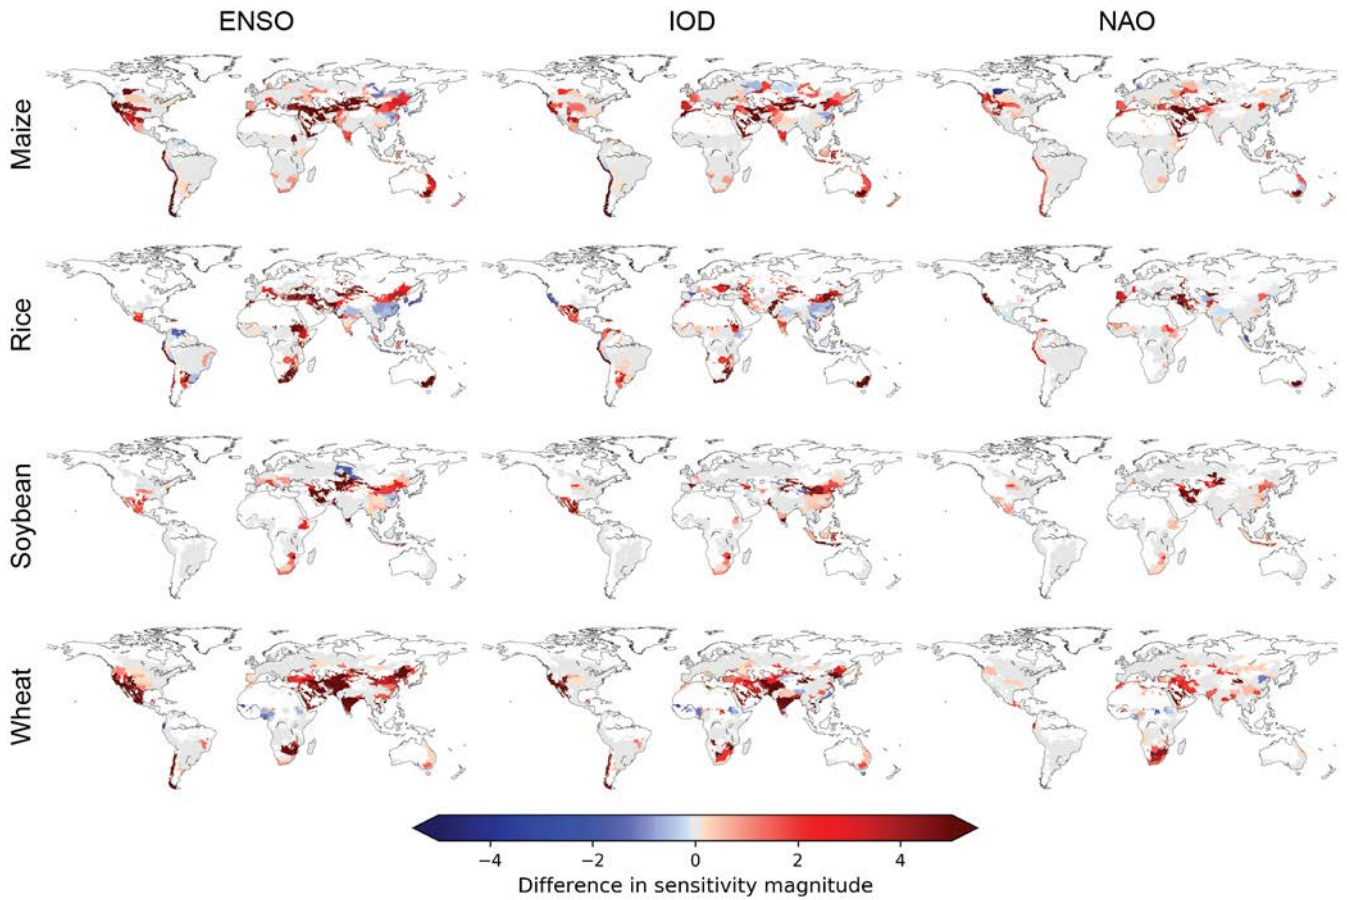

Figure S15. Actual vs rainfed sensitivity. Difference in magnitude of crop yield sensitivity to ENSO, IOD and NAO between actual and fully rainfed scenario at FPU scale. Results are shown only for those FPUs that show statistically significant ( $p > 0.1$ ) sensitivity in either scenario. If neither scenario shows significant sensitivity, difference marked as zero (gray color). The sensitivity values are derived using crop yield data from all GCMs that simulate the crop in question with the AgMERRA climate input using the fullharm (harm-suffN for LPJmL and LPJ-GUESS) set-up. Statistically insignificant ( $p > 0.1$ ) sensitivity values are marked as zero. White color denotes that the crop in question is not produced in that area.



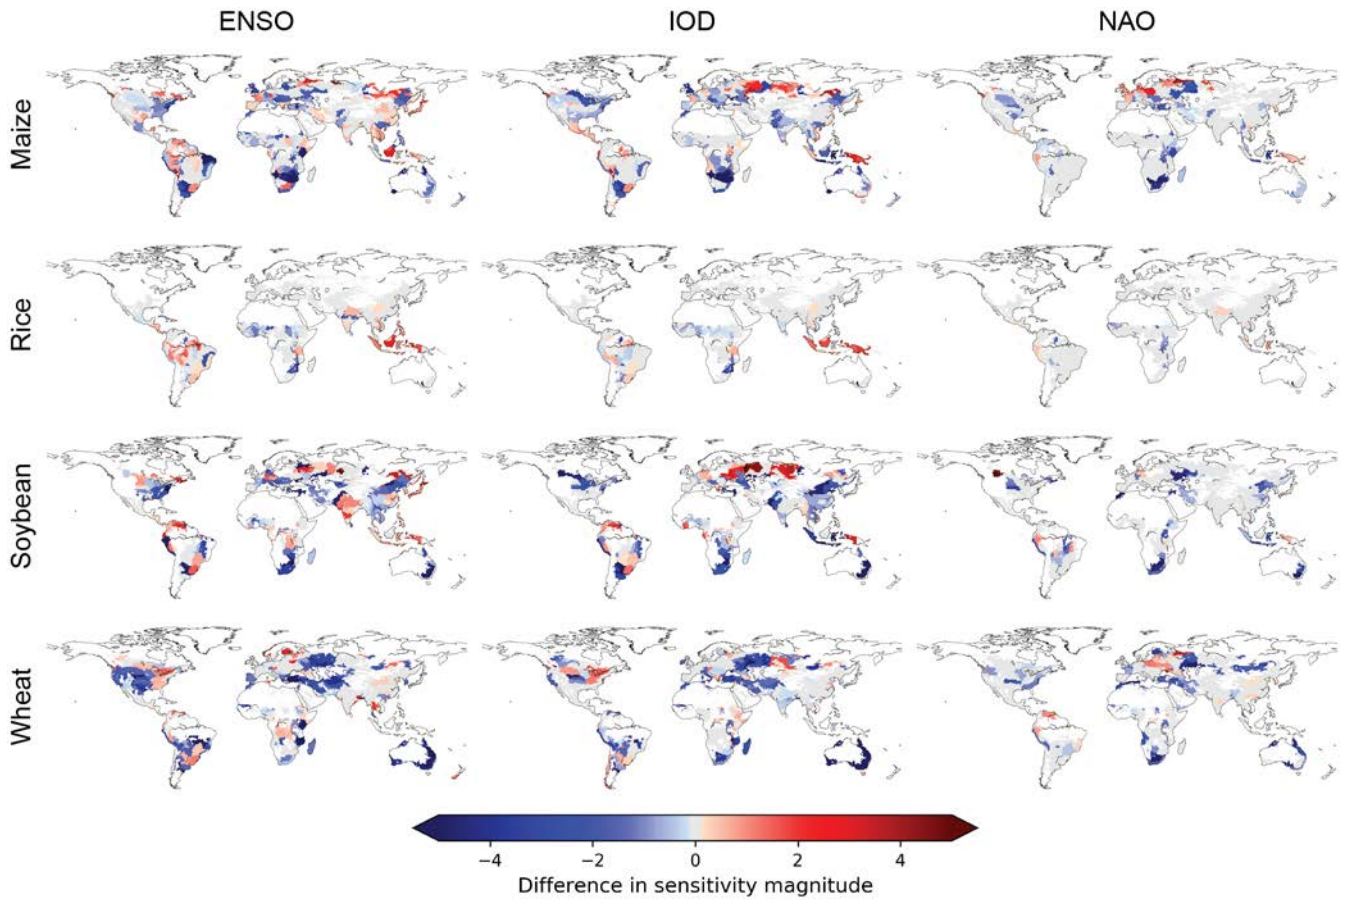

Figure S16. Actual vs fully irrigated sensitivity. Difference in magnitude of crop yield sensitivity to ENSO, IOD and NAO between actual and fully irrigated scenario at FPU scale. Results are shown only for those FPUs that show statistically significant ( $p > 0.1$ ) sensitivity in either scenario. If neither scenario shows significant sensitivity, difference marked as zero (gray color). The sensitivity values are derived from a sample including crop yield data from all GGCMs that simulate the crop in question with the AgMERRA climate input. White color denotes that the crop in question is not produced in that area.

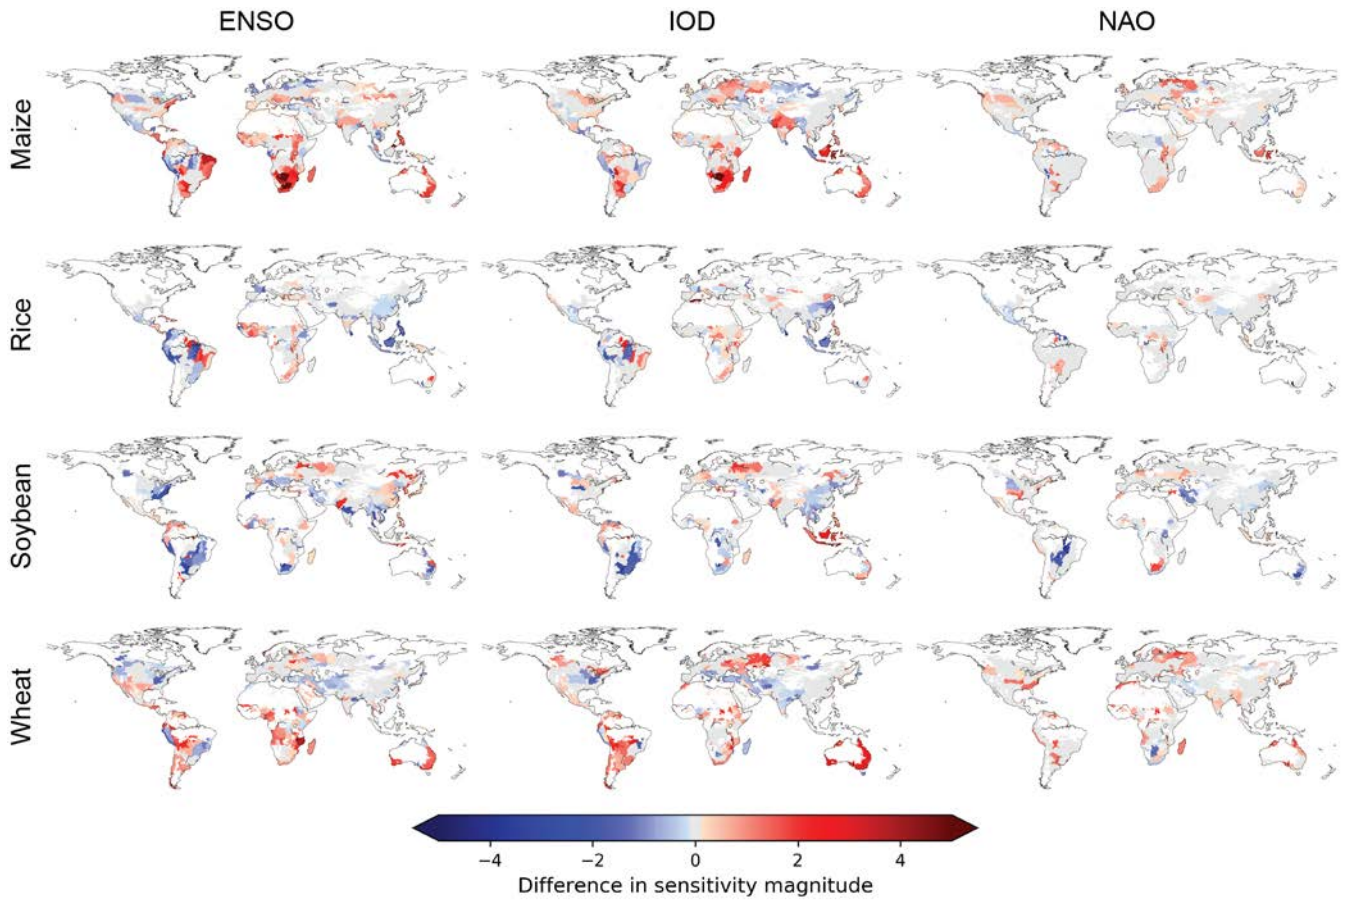

Figure S17. Actual vs fully fertilized sensitivity. Difference in magnitude of crop yield sensitivity to ENSO, IOD and NAO between actual and fully fertilized scenario at FPU scale. Results are shown only for those FPUs that show statistically significant ( $p > 0.1$ ) sensitivity in either scenario. If neither scenario shows significant sensitivity, difference marked as zero (gray color). The sensitivity values are derived using crop yield data from all GCMs that simulate the crop in question with the AgMERRA climate input, and have data for both 'fullharm' and 'harm-suffN settings: pDSSAT, EPIC-Boku, EPIC-IIASA, GEPIC, pAPSIM, PEGASUS, EPIC-TAMU, ORCHIDEE-crop, PEPIC. White color denotes that the crop in question is not produced in that area.

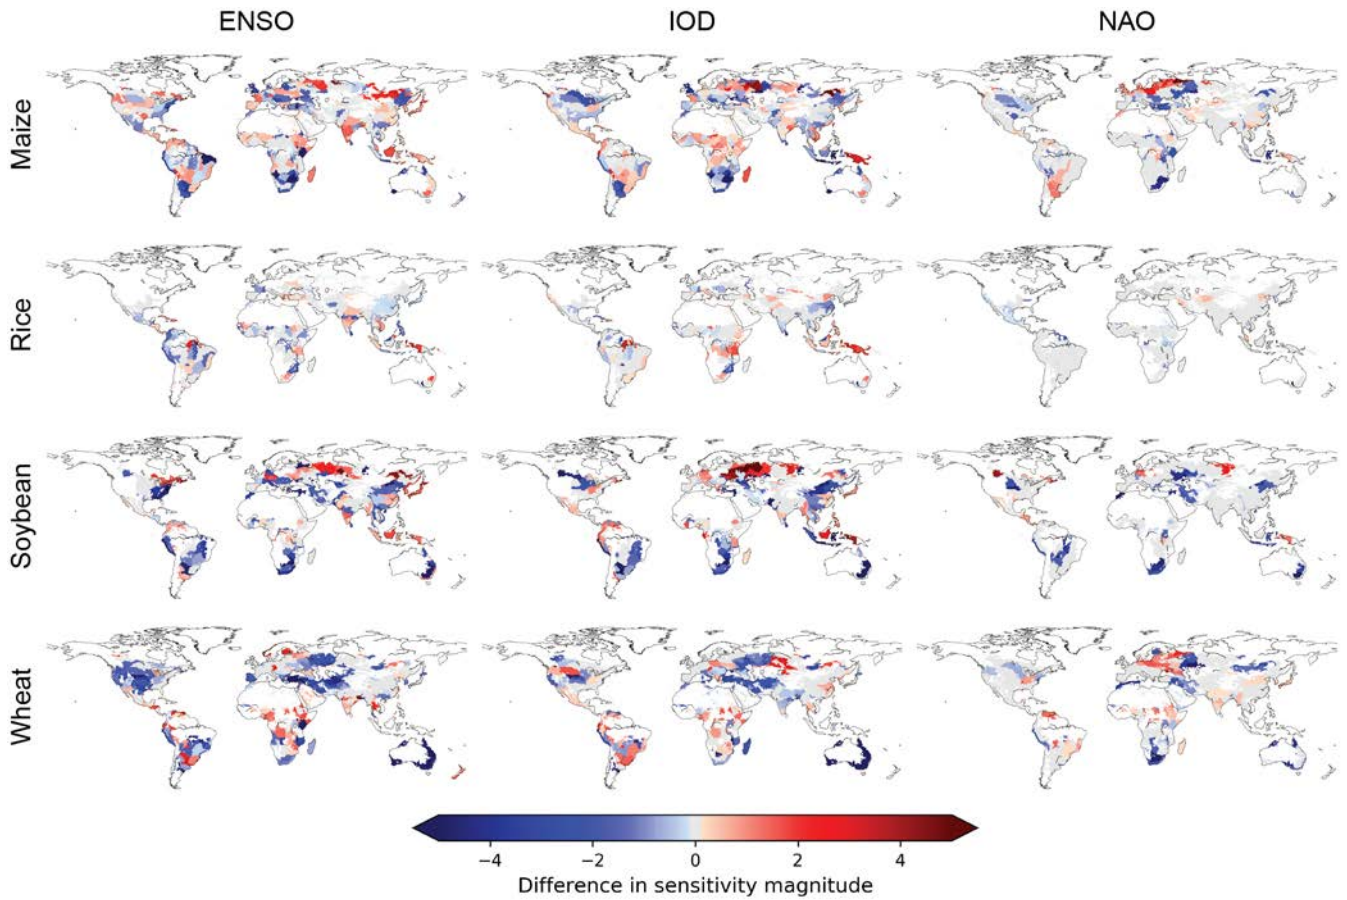

Figure S18. Actual vs fully fertilized and irrigated sensitivity. Difference in magnitude of crop yield sensitivity to ENSO, IOD and NAO between actual and fully fertilized and irrigated scenario at FPU scale. Results are shown only for those FPUs that show statistically significant ( $p > 0.1$ ) sensitivity in either scenario. If neither scenario shows significant sensitivity, difference marked as zero (gray color). The sensitivity values are derived using crop yield data from all GCMs that simulate the crop in question with the AgMERRA climate input, and have data for both ‘fullharm’ and ‘harm-suffN settings: pDSSAT, EPIC-Boku, EPIC-IIASA, GEPIC, pAPSIM, PEGASUS, EPIC-TAMU, ORCHIDEE-crop, PEPIC. White color denotes that the crop in question is not produced in that area.

# Anomalies during strong oscillation phases (%)

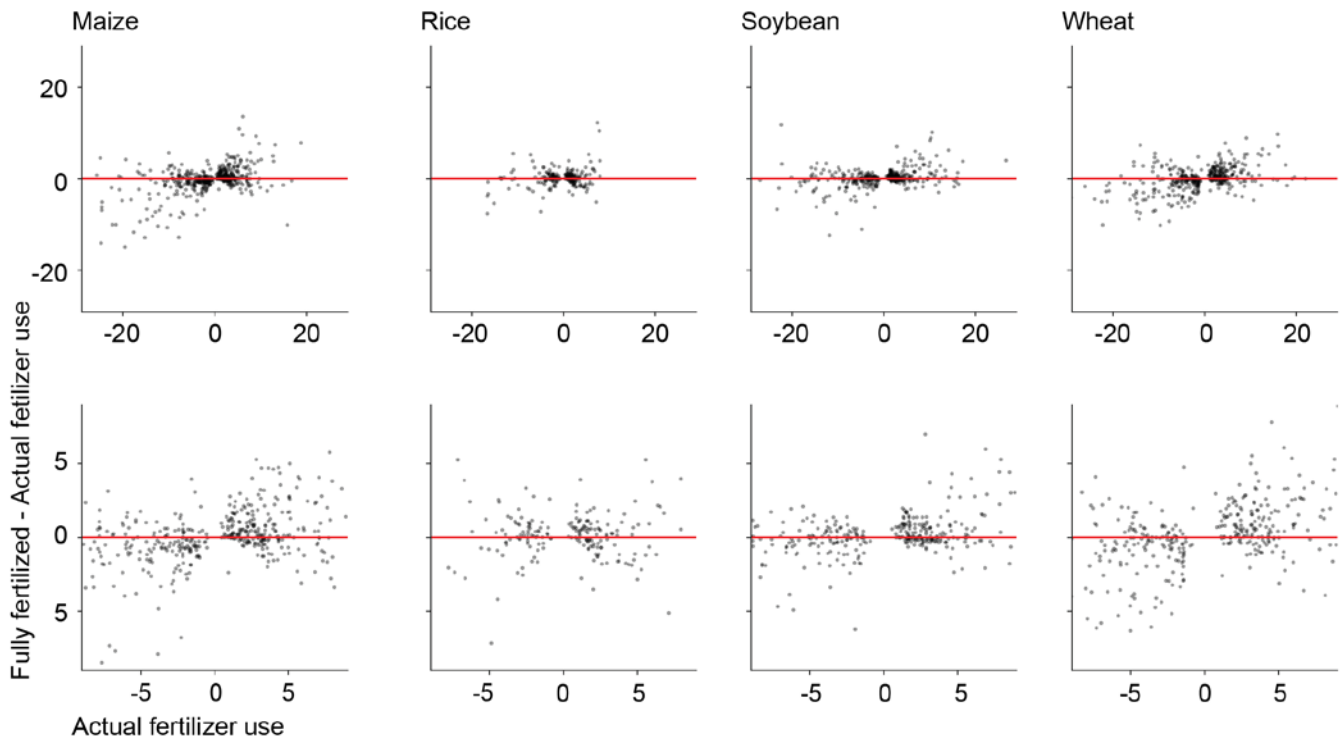

**Figure S19. Anomaly difference for actual and fully fertilized cropping systems during strong oscillation phases through all oscillations and FPU. Anomaly difference between the scenarios is shown in the y-axis, while x-axis shows the anomaly for the actual scenario. Both rows in figure contain the same information, but with shorter axis span.**
